# Supplementary material for: Covalent organic framework encapsulated multi-walled carbon nanotubes for ultrasensitive electrochemical determination of lead ions in water and e-cigarette samples
Source: Royal Society of Chemistry journal article supplement (doi:10.1039/d4nr04871g), 2025-01-01
Supplement: d4nr04871g1.pdf [file d4nr04871g1.pdf]

*Supplementary Information*

**Covalent Organic Framework Encapsulated Multi-Walled Carbon Nanotubes for Ultrasensitive Electrochemical Determination of Lead Ions in Water and E-Cigarette Samples**

Hao Zhang<sup>a,f</sup>, Hao Cheng<sup>a</sup>, Dan Chen<sup>b</sup>, Chunqiong Wang<sup>b\*</sup>, Jintao Mao<sup>c</sup>, Zhihua Yang<sup>c</sup>,  
Wen-Tong Chen<sup>d</sup>, Lijun Li<sup>a\*</sup> and Guangzhi Hu<sup>c,f\*</sup>

<sup>a</sup> Guangxi Key Laboratory of Green Processing of Sugar Resources, College of Biological and Chemical Engineering, Guangxi University of Science and Technology, Liuzhou 545006, China.

<sup>b</sup> Yunnan Tobacco Quality Supervision and Test Station, Kunming 650106, China.

<sup>c</sup> Heqing County Forestry Ecological Investment Development Co., Ltd, Dali 671500, China.

<sup>d</sup> Key Laboratory of Coordination Chemistry of Jiangxi Province, School of Chemistry and Chemical Engineering, Jinggangshan University, Ji'an 343009, China.

<sup>e</sup> Institute for Advanced Study, Chengdu University, Chengdu 610106, China.

<sup>f</sup> Qilu Lake Field Scientific Observation and Research Station for Plateau Shallow Lake in Yunnan Province, School of Ecology and Environmental Science, Yunnan University, Kunming 650504, China.

\*The corresponding author E-mail addresses: [wangchunqiong.ytqs@outlook.com](mailto:wangchunqiong.ytqs@outlook.com) (C. Wang), [lilijun0562@sina.com](mailto:lilijun0562@sina.com) (L. Li), and [guangzhihu@ynu.edu.cn](mailto:guangzhihu@ynu.edu.cn) (G. Hu).

## **S1. Modification and preparation of electrodes**

Initially, the glassy carbon electrode (GCE) was polished using 0.5  $\mu\text{m}$  and 50 nm alumina ( $\text{Al}_2\text{O}_3$ ) powders to achieve a mirror-like finish. Following this, ultrasonic cleaning was conducted with ethanol, followed by rinsing with deionized water. After that, the electrode surface was dried with nitrogen. Subsequently, the electrode surface was dried using nitrogen. The ground Tp-Bpy-COFs@MWCNTs were then weighed to 0.5 mg and placed into a 1.5 ml vial containing 950  $\mu\text{L}$  of deionized water and 50  $\mu\text{L}$  of Nafion, following optimized conditions to create the dispersion solution. This prepared solution underwent ultrasonic treatment for 20 minutes to ensure even dispersion. The uniformly dispersed droplets were then deposited onto the surface of the glassy carbon electrode (GCE) to fabricate Nafion@Tp-Bpy-COF@MWCNTs-GCE. The preparation process for other modified electrodes followed a similar approach.

## **S2. Electrochemical measurement**

All tests for lead ions were conducted using an RST5000 electrochemical workstation and a 100 mL electrolyzer, employing square wave stripping voltammetry (SWASV) in a HAc-NaAc buffer. To prepare the e-cigarette digestion solution, 0.3-0.4 g of e-cigarette liquid is first weighed and placed in a polytetrafluoroethylene tank. Simultaneously, a blank sample is prepared by adding 5 mL of nitric acid and 2 mL of hydrogen peroxide. Following the microwave digestion procedure outlined in the standard, the reaction mixture is heated. After digestion, the tube is removed, and the digestion solution is transferred to a 50 mL

reagent bottle. The inner tank is rinsed with water three times, and the washing solution is combined and adjusted to the appropriate volume. Finally, the sample is tested using the GB5009.9-2014 conditions.

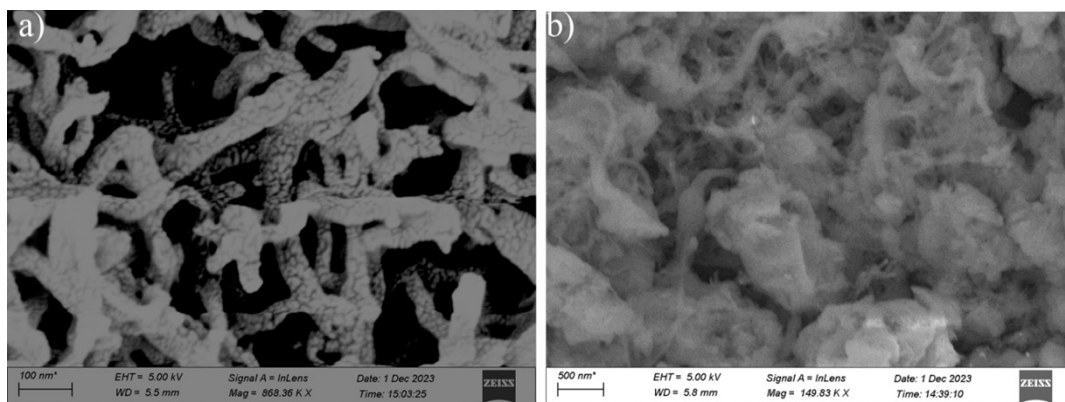

**Fig. S1.** (a-b) SEM image of Tp-Bpy-COFs@MWCNTs.

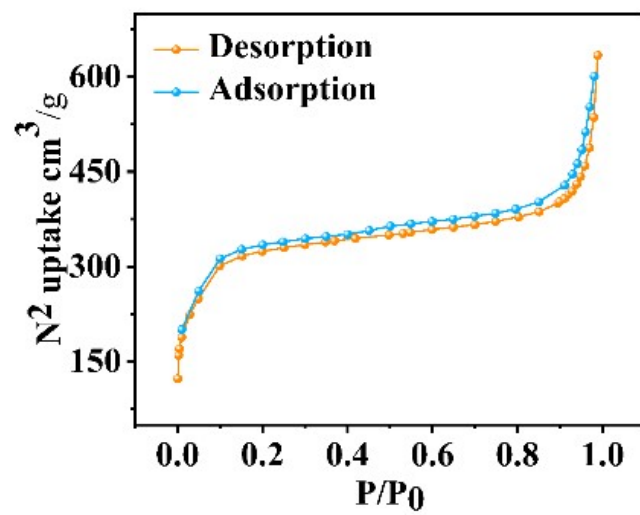

**Fig. S2.** BET image of Tp-Bpy-COFs@MWCNTs.

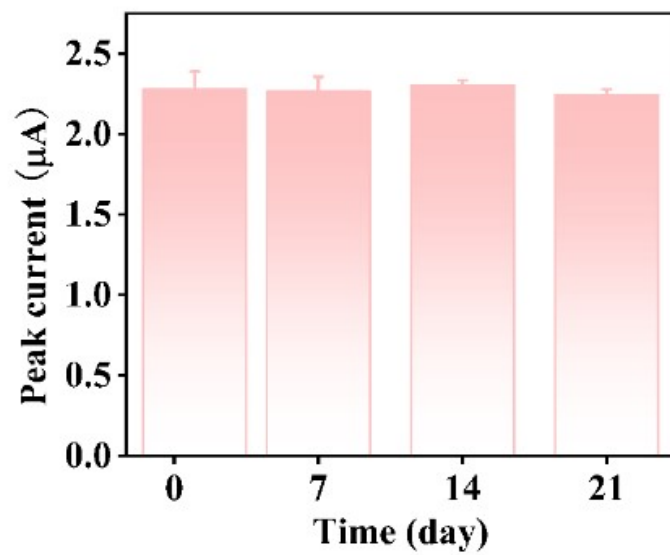

**Fig. S3.** Stability of Tp-Bpy-COFs@MWCNT/Nafion/GCE.

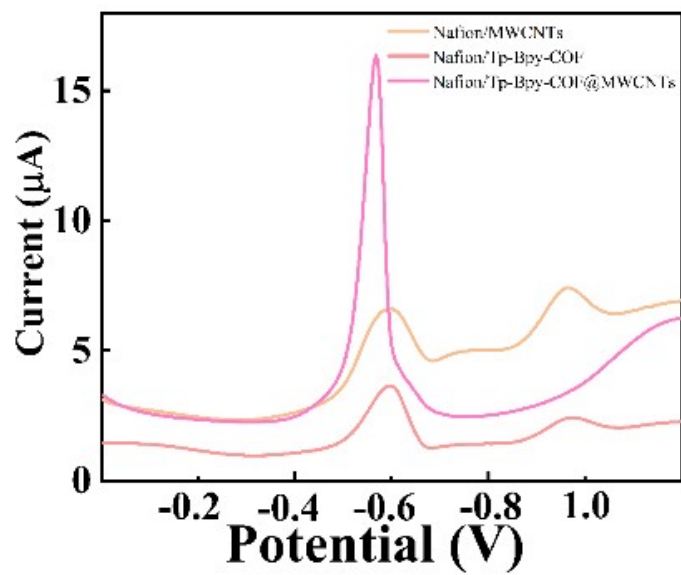

**Fig. S4.** Comparison of SWASV Performance for Naftion/COF@MWCNTs, Naftion/COF, and Naftion/MWCNTs.

**Table. S1.** Material name abbreviation

| Full name of material                                               |      | Abbreviation   |
|---------------------------------------------------------------------|------|----------------|
| Graphene oxide                                                      |      | rGO            |
| Chitosan                                                            |      | CS             |
| $\text{Na}_9[\text{BiW}_9\text{O}_{33}] \cdot 16\text{H}_2\text{O}$ |      | $\text{BiW}_9$ |
| Nanoporous carbon                                                   |      | NPS            |
| 1,3,6,8-pyrenetetrasulfonic                                         | acid | PyTS           |
| sodium salt-functionalized                                          |      |                |
| Carbon nanohorns                                                    |      | CNHs           |
| Polyaniline                                                         |      | PANI           |
| Laser scribed graphene                                              |      | LSG            |
| Electrochemically reduced graphene                                  |      | ErGO           |
| oxide                                                               |      |                |
| Cellulose graphene                                                  |      | CSG            |
| BC-Au electrode and ionic liquid                                    |      | CILE           |
| carbon paste electrode                                              |      |                |
| Graphene                                                            |      | G              |



**Table. S2.** Comparison of Detection Methods for Pb<sup>2+</sup> Analysis

| Detection Method | Electrochemical                                                  | AAS                                                 | ICP-MS                                               |
|------------------|------------------------------------------------------------------|-----------------------------------------------------|------------------------------------------------------|
| Comparison       | Method (SWASV)                                                   |                                                     |                                                      |
| Equipment Cost   | Low                                                              | Medium                                              | High                                                 |
| Detection Time   | Simple operation, rapid detection                                | Requires complex preprocessing, long detection time | Requires high technical support, long detection time |
| Portability      | Suitable for on-site detection                                   | Laboratory detection                                | Laboratory detection                                 |
| Sensitivity      | Up to 10 <sup>-9</sup> M<br>(depending on material modification) | Up to 10 <sup>-6</sup> M                            | Up to 10 <sup>-12</sup> M                            |
